# Supplementary figures and images for: Discovery and biological evaluation of a potent small molecule CRM1 inhibitor for its selective ablation of extranodal NK/T cell lymphoma
Source: eLife journal article supplement (doi:10.7554/elife.80625), 2023-10-27

**C**

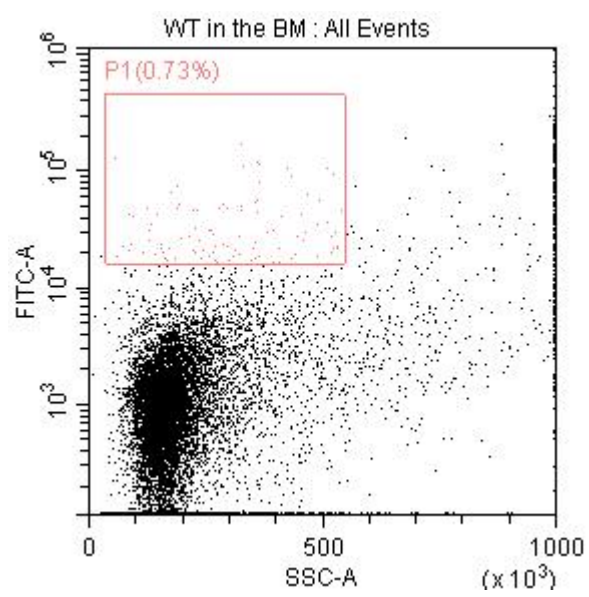

**D**

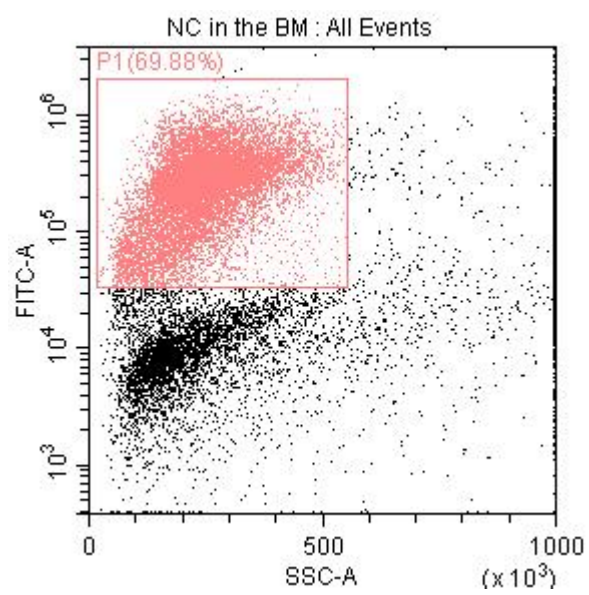

**E**

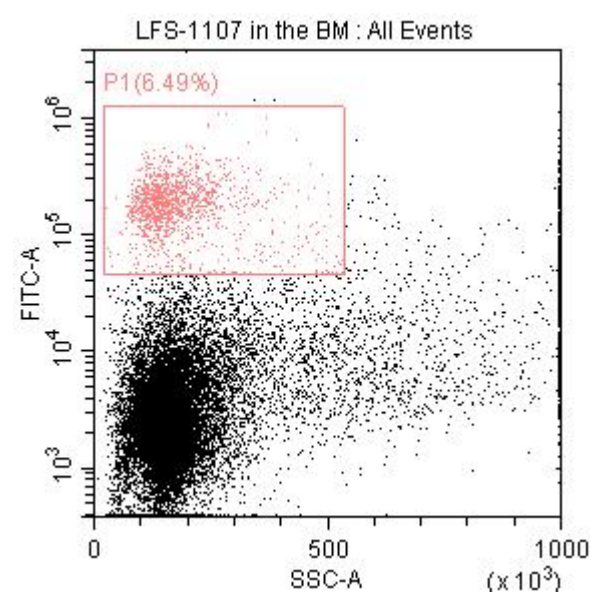

Supplement: fig3-data3 [file elife-80625-fig3-data3-v2.zip]
